# Supplementary material for: Molecular Mimicry Analyses Unveiled the Human Herpes Simplex and Poxvirus Epitopes as Possible Candidates to Incite Autoimmunity
Source: MDPI journal article supplement (doi:10.3390/pathogens11111362), 2022-11-16
Supplement: s1 [file s1]

**Table S1:** Viral-human homologs proteins metabolic pathways enrichment analysis.

| S.No | Human Uniprot IDs     | Homologous Virus IDs | Number of Pathways | Pathway Source                                        | Pathway name                                                                       | p-value  |
|------|-----------------------|----------------------|--------------------|-------------------------------------------------------|------------------------------------------------------------------------------------|----------|
| 1    | sp P00374 DYR_HUMAN   | gb:ABD28857          | 9                  | REACTOME                                              | Translesion synthesis by Y family DNA polymerases bypasses lesions on DNA template | 0.001016 |
|      |                       |                      |                    | WikiPathways                                          | ATM Signaling                                                                      | 0.001069 |
|      |                       |                      |                    | REACTOME                                              | Signaling by ERBB4                                                                 | 0.001123 |
|      |                       |                      |                    | SMPDB                                                 | Cetuximab Action Pathway                                                           | 0.001225 |
|      |                       |                      |                    | SMPDB                                                 | Gefitinib Action Pathway                                                           | 0.001225 |
|      |                       |                      |                    | SMPDB                                                 | Panitumumab Action Pathway                                                         | 0.001225 |
|      |                       |                      |                    | SMPDB                                                 | Trastuzumab Action Pathway                                                         | 0.001225 |
|      |                       |                      |                    | Spike                                                 | DNA damage induced G1-S checkpoint                                                 | 0.001474 |
| 2    | sp P04183 KITH_HUMAN  | gb:AXN75107          | 9                  | KEGG                                                  | p53 signaling                                                                      | 0.001004 |
|      |                       |                      |                    | WikiPathways                                          | miRNA Regulation of DNA Damage Response                                            | 0.001004 |
|      |                       |                      |                    | REACTOME                                              | RNA Polymerase II Transcription                                                    | 0.001055 |
|      |                       |                      |                    | REACTOME                                              | Post-translational protein phosphorylation                                         | 0.00108  |
|      |                       | REACTOME             |                    | G2/M Transition                                       | 0.001198                                                                           |          |
|      |                       | Panther_Pathway      |                    | p53                                                   | 0.001222                                                                           |          |
|      |                       | Spike                |                    | DAPk family                                           | 0.001222                                                                           |          |
|      |                       | REACTOME             |                    | Generic Transcription Pathway                         | 0.001227                                                                           |          |
|      |                       | PID                  |                    | Validated targets of C-MYC transcriptional activation | 0.001634                                                                           |          |
| 3    | sp P04818 TYSY_HUMAN  | gb:QCA43223          | 4                  | KEGG                                                  | Epithelial cell signaling in Helicobacter pylori infection                         | 0.001163 |
|      |                       |                      |                    | REACTOME                                              | Immune System                                                                      | 0.001186 |
|      |                       | gb:BBA90853          |                    | PID                                                   | Beta5 beta6 beta7 and beta8 integrin cell surface interactions                     | 0.001209 |
|      |                       |                      |                    | WikiPathways                                          | Cells and Molecules involved in local acute inflammatory response                  | 0.001209 |
| 4    | sp P09341 GROA_HUMAN  | gb:AEV80662          | 5                  | PID                                                   | Signaling events mediated by Stem cell factor receptor (c-Kit)                     | 0.001001 |
|      |                       |                      |                    | KEGG                                                  | Endocytosis                                                                        | 0.001179 |
|      |                       |                      |                    | REACTOME                                              | Signal Transduction                                                                | 0.001231 |
|      |                       |                      |                    | REACTOME                                              | Innate Immune System                                                               | 0.00134  |
|      |                       |                      |                    | KEGG                                                  | Epithelial cell signaling in Helicobacter pylori infection                         | 0.001706 |
| 5    | sp P19875 CXCL2_HUMAN | gb:AEV80661          | 9                  | Panther_Pathway                                       | p53_pathway_feedback_loops_2                                                       | 0.001033 |
|      |                       |                      |                    | WikiPathways                                          | Neural Crest Cell Migration in Cancer                                              | 0.001033 |

|   |                      |    |             |                 |                                                                             |          |
|---|----------------------|----|-------------|-----------------|-----------------------------------------------------------------------------|----------|
| 6 | sp P23921 RIR1_HUMAN | 14 | gb:AXN75085 | WikiPathways    | TNF related weak inducer of apoptosis (TWEAK) Signaling                     | 0.001033 |
|   |                      |    |             | KEGG            | Transcriptional misregulation in cancer                                     | 0.001072 |
|   |                      |    |             | Panther_Pathway | PI_3-Kinase                                                                 | 0.001083 |
|   |                      |    |             | PID             | Syndecan-1-mediated signaling events                                        | 0.001083 |
|   |                      |    |             | WikiPathways    | Interleukin-11 Signaling                                                    | 0.001083 |
|   |                      |    |             | REACTOME        | Signal Transduction                                                         | 0.001191 |
|   |                      |    |             | KEGG            | Legionellosis                                                               | 0.001766 |
|   |                      |    | gb:AST09466 | REACTOME        | p53-Dependent G1 DNA Damage Response                                        | 0.001002 |
|   |                      |    |             | REACTOME        | p53-Dependent G1/S DNA damage checkpoint                                    | 0.001002 |
|   |                      |    |             | REACTOME        | Cell Cycle, Mitotic                                                         | 0.001022 |
|   |                      |    |             | PID             | mTOR signaling                                                              | 0.001049 |
|   |                      |    |             | REACTOME        | G1/S DNA Damage Checkpoints                                                 | 0.001097 |
|   |                      |    |             | SMPDB           | Morphine Metabolism Pathway                                                 | 0.001123 |
|   |                      |    |             | Spike           | Response to DSB                                                             | 0.001123 |
|   |                      |    | gb:AUL80484 | KEGG            | MicroRNAs in cancer                                                         | 0.001159 |
|   |                      |    |             | KEGG            | Hepatitis C                                                                 | 0.001218 |
|   |                      |    |             | WikiPathways    | Integrated Breast Cancer                                                    | 0.001218 |
|   |                      |    |             | WikiPathways    | Pyrimidine metabolism and related diseases                                  | 0.00127  |
|   |                      |    |             | ACSN2           | PENTOSE_PHOSPHATE                                                           | 0.001426 |
|   |                      |    |             | WikiPathways    | Nucleotide Metabolism                                                       | 0.001591 |
|   |                      |    |             | HumanCyc        | superpathway of pyrimidine deoxyribonucleotides <i>de novo</i> biosynthesis | 0.001764 |
| 7 | sp P31350 RIR2_HUMAN | 12 | gb:AZY90656 | KEGG            | p53 signaling                                                               | 0.001006 |
|   |                      |    |             | WikiPathways    | miRNA Regulation of DNA Damage Response                                     | 0.001006 |
|   |                      |    |             | WikiPathways    | Pyrimidine metabolism and related diseases                                  | 0.001035 |
|   |                      |    |             | ACSN2           | DNA_DAMAGE_RESPONSE                                                         | 0.001049 |
|   |                      |    |             | KEGG            | Melanoma                                                                    | 0.001049 |
|   |                      |    | gb:AST09433 | BioCarta        | regulation of cell cycle progression by plk3                                | 0.001162 |
|   |                      |    |             | REACTOME        | TP53 Regulates Transcription of Genes Involved in G2 Cell Cycle Arrest      | 0.001162 |
|   |                      |    |             | WikiPathways    | TGF-B Signaling in Thyroid Cells for Epithelial-Mesenchymal Transition      | 0.001162 |
|   |                      |    |             | NetPath         | Fibroblast growth factor-1                                                  | 0.001183 |
|   |                      |    |             |                 |                                                                             |          |

|          |                                                          |             |    |                 |                                                                             |             |
|----------|----------------------------------------------------------|-------------|----|-----------------|-----------------------------------------------------------------------------|-------------|
| 8        | sp P35354 PGH2_HUMAN                                     | gb:AEV80548 | 16 | REACTOME        | The role of GTSE1 in G2/M progression after G2 checkpoint                   | 0.001183    |
|          |                                                          |             |    | WikiPathways    | Nucleotide Metabolism                                                       | 0.001296    |
|          |                                                          |             |    | HumanCyc        | superpathway of pyrimidine deoxyribonucleotides <i>de novo</i> biosynthesis | 0.001438    |
|          |                                                          |             |    | KEGG            | Bacterial invasion of epithelial cells                                      | 0.001091    |
|          |                                                          |             |    | KEGG            | Pancreatic cancer                                                           | 0.001091    |
|          |                                                          |             |    | NetPath         | Fibroblast growth factor-1                                                  | 0.001091    |
|          |                                                          |             |    | NetPath         | IL6                                                                         | 0.001091    |
|          |                                                          |             |    | REACTOME        | The role of GTSE1 in G2/M progression after G2 checkpoint                   | 0.001091    |
|          |                                                          |             |    | BioCarta        | er associated degradation (erad)                                            | 0.0011      |
|          |                                                          |             |    | PID             | Degradation of beta catenin                                                 | 0.0011      |
|          |                                                          |             |    | REACTOME        | TP53 Regulates Transcription of Genes Involved in G2 Cell Cycle Arrest      | 0.0011      |
|          |                                                          |             |    | REACTOME        | Downstream signaling events of B Cell Receptor (BCR)                        | 0.001179    |
|          |                                                          |             |    | ACSN2           | PI3K_AKT_MTOR                                                               | 0.001208    |
|          |                                                          |             |    | REACTOME        | Protein ubiquitination                                                      | 0.001224    |
|          |                                                          |             |    | REACTOME        | Regulation of TP53 Activity through Methylation                             | 0.001227    |
|          |                                                          |             |    | REACTOME        | Immune System                                                               | 0.001266    |
|          |                                                          |             |    | KEGG            | Kaposi sarcoma-associated herpesvirus infection                             | 0.001488    |
|          |                                                          |             |    | INOH            | Prostaglandin Leukotriene metabolism                                        | 0.001649    |
|          |                                                          |             |    | Panther_Pathway | Inflammation_mediated_by_chemokine_and_cytokine_signaling                   | 0.001848    |
|          |                                                          |             |    | 9               | sp P49916 DNLI3_HUMAN                                                       | gb:AAY97564 |
| REACTOME | Signaling by EGFR                                        | 0.001034    |    |                 |                                                                             |             |
| BioCarta | pertussis toxin-insensitive ccr5 signaling in macrophage | 0.00104     |    |                 |                                                                             |             |
| KEGG     | Nucleotide excision repair                               | 0.001103    |    |                 |                                                                             |             |
| ACSN2    | MITOCHONDRIAL_GENES                                      | 0.001159    |    |                 |                                                                             |             |
| REACTOME | Transcriptional regulation by small RNAs                 | 0.001159    |    |                 |                                                                             |             |
| IPAVS    | Gq_activated_pathways_in_maladaptive_hypertrophy         | 0.001174    |    |                 |                                                                             |             |
| KEGG     | Th17 cell differentiation                                | 0.001201    |    |                 |                                                                             |             |

**Table S2:** Viral proteins homologous with human proteins sharing homologous epitopes.

| S. No | Virus Homolog ID | Virus Protein name                                              | Human Homologs IDs             | Human Protein name                                 |
|-------|------------------|-----------------------------------------------------------------|--------------------------------|----------------------------------------------------|
| 1     | gb:AXN75085      | ribonucleotide reductase large subunit [Akhmeta virus]          | sp P23921 RIR1_HUMAN           | Ribonucleoside-diphosphate reductase large subunit |
| 2     | gb:AST09466      | ribonucleotide reductase large subunit [NY_014 poxvirus]        | sp P23921 RIR1_HUMAN           | Ribonucleoside-diphosphate reductase large subunit |
| 3     | gb:AEV80548      | prostaglandin G/H synthase 2 [Cercopithecine betaherpesvirus 5] | sp P35354 PGH2_HUMAN           | Prostaglandin-G/H synthase 2                       |
| 4     | gb:AAY97564      | DNA ligase [Monkeypox virus]                                    | sp P49916 DNLI3_HUMAN          | DNA ligase 3                                       |
| 5     | gb:AST09563      | ATP-dependent DNA ligase [NY_014 poxvirus]                      | sp P49916 DNLI3_HUMAN          | DNA ligase 3                                       |
| 6     | gb:AZY90656      | CPXV051 protein [Cowpox virus]                                  | sp P31350 RIR2_HUMAN           | Ribonucleoside-diphosphate reductase subunit M2    |
| 7     | gb:AST09433      | ribonucleotide reductase small subunit [NY_014 poxvirus]        | sp P31350 RIR2_HUMAN           | Ribonucleoside-diphosphate reductase subunit M2    |
| 8     | gb:QCA43223      | ORF13 [Human alphaherpesvirus 3]                                | sp P04818 TYSY_HUMAN           | Thymidylate synthase                               |
| 9     | gb:BBA90853      | ORF70 [Human gammaherpesvirus 8]                                | sp P04818 TYSY_HUMAN           | Thymidylate synthase                               |
| 10    | gb:AQY16903      | MC152 [Mollusum contagiosum virus subtype 1]                    | sp Q9H2F3 3BHS7_HUMAN          | 3 beta-hydroxysteroid dehydrogenase type 7         |
| 11    | gb:ADZ29327      | NMDA receptor-like protein [Cowpox virus]                       | sp Q9HC24 LFG4_HUMAN           | Protein lifeguard 4                                |
| 12    | gb:AZT86284      | MC066L [Mollusum contagiosum virus]                             | sp P07203 GPX1_HUMAN           | Glutathione peroxidase 1                           |
| 13    | gb:AXN75107      | thymidine kinase [Akhmeta virus]                                | sp P04183 KITH_HUMAN           | Thymidine kinase, cytosolic                        |
| 14    | gb:AST09487      | thymidine kinase [NY_014 poxvirus]                              | sp P04183 KITH_HUMAN           | Thymidine kinase, cytosolic                        |
| 15    | gb:QCF48225      | interleukin-10 [Human gammaherpesvirus 4]                       | sp P22301 IL10_HUMAN           | Interleukin-10                                     |
| 16    | gb:ABD28857      | ORF2 [Human gammaherpesvirus 8]                                 | sp P00374 DYR_HUMAN            | Dihydrofolate reductase                            |
| 17    | gb:AAY97032      | dUTPase [Monkeypox virus]                                       | tr H0YNW5 H0YNW5_HUMAN         | Deoxyuridine 5'-triphosphate nucleotidohydrolase   |
| 18    | gb:AUL80434      | CPXV049 protein [Vaccinia virus]                                | tr A0A0C4DGL3 A0A0C4DGL3_HUMAN | Deoxyuridine 5'-triphosphate nucleotidohydrolase   |
| 19    | gb:AUL80132      | CPXV044 protein [Vaccinia virus]                                | sp Q8IV08 PLD3_HUMAN           | 5'-3' exonuclease PLD3                             |
| 20    | gb:AAY97407      | unknown [Monkeypox virus]                                       | sp Q9HC24 LFG4_HUMAN           | Protein lifeguard 4                                |

|    |             |                                                           |                                    |                                                       |
|----|-------------|-----------------------------------------------------------|------------------------------------|-------------------------------------------------------|
| 21 | gb:AUL80484 | hypothetical protein<br>[Vaccinia virus]                  | sp P23921 RIR1_HUMAN               | Ribonucleoside-diphosphate<br>reductase large subunit |
| 22 | gb:AUL80431 | CPXV045 protein<br>[Vaccinia virus]                       | tr A0A3B3ITT3 A0A3B3IT<br>T3_HUMAN | Monoglyceride lipase                                  |
| 23 | gb:AEV80662 | chemokine vCXCL7<br>[Cercopithecine<br>betaherpesvirus 5] | sp P09341 GROA_HUMA<br>N           | Growth-regulated alpha<br>protein                     |
| 24 | gb:AEV80661 | chemokine vCXCL7<br>[Cercopithecine<br>betaherpesvirus 5] | sp P19875 CXCL2_HUMA<br>N          | C-X-C motif chemokine 2                               |

**Table S3:** The hydrogen bonding interaction between the top ranked virus-human molecular mimic epitope and HLA and TLR receptors residues. The interactions was identified by molecular docking of epitope within HLA and TLR4 receptors.

|                                                                                         |
|-----------------------------------------------------------------------------------------|
| <b>HLA Receptor (Chain A) interactions with Human-virus identical epitope (Chain B)</b> |
| ASN(84):A<-->PHE(1):B                                                                   |
| TYR(79):A<-->ASP(4):B                                                                   |
| ASN(15):A<-->CYS(5):B                                                                   |
| THR(83):A<-->LEU(13):B                                                                  |
| THR(83):A<-->ASP(15):B                                                                  |
| <b>TLR Receptor (Chain A) interaction with Human-virus identical epitope (Chain B)</b>  |
| CYS(585):A<-->ASP(6):B                                                                  |
| GLU(586):A<-->CYS(7):B                                                                  |
| GLU(586):A<-->LEU(8):B                                                                  |
| LYS(595):A<-->CYS(1):B                                                                  |
| VAL(620):A<-->CYS(1):B                                                                  |
| ASN(624):A<-->LEU(2):B                                                                  |

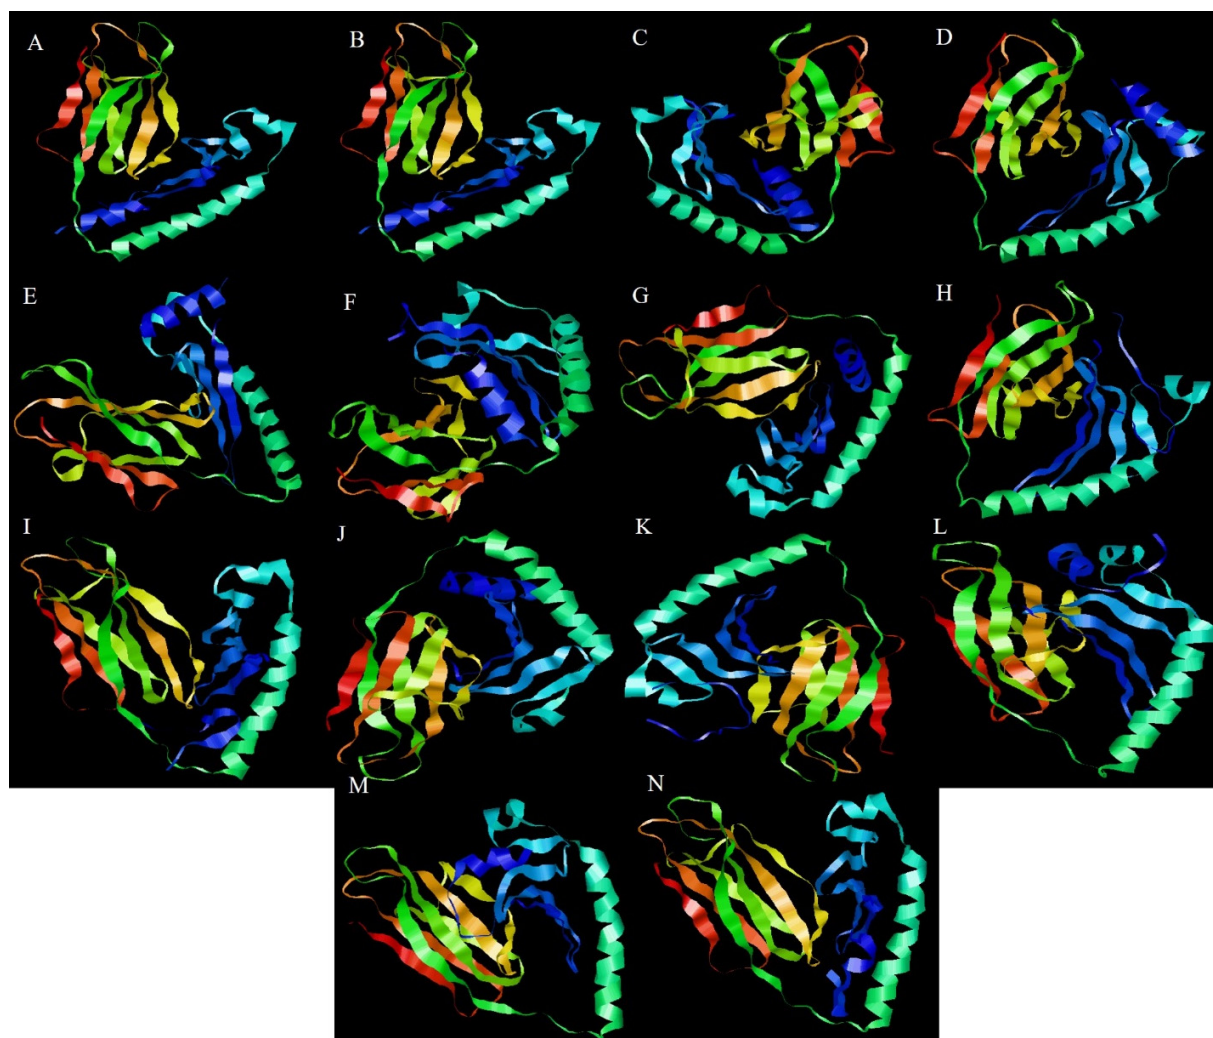

**Figure S1:** Molecular docking results of mimicking human peptides docked with HLA receptor.

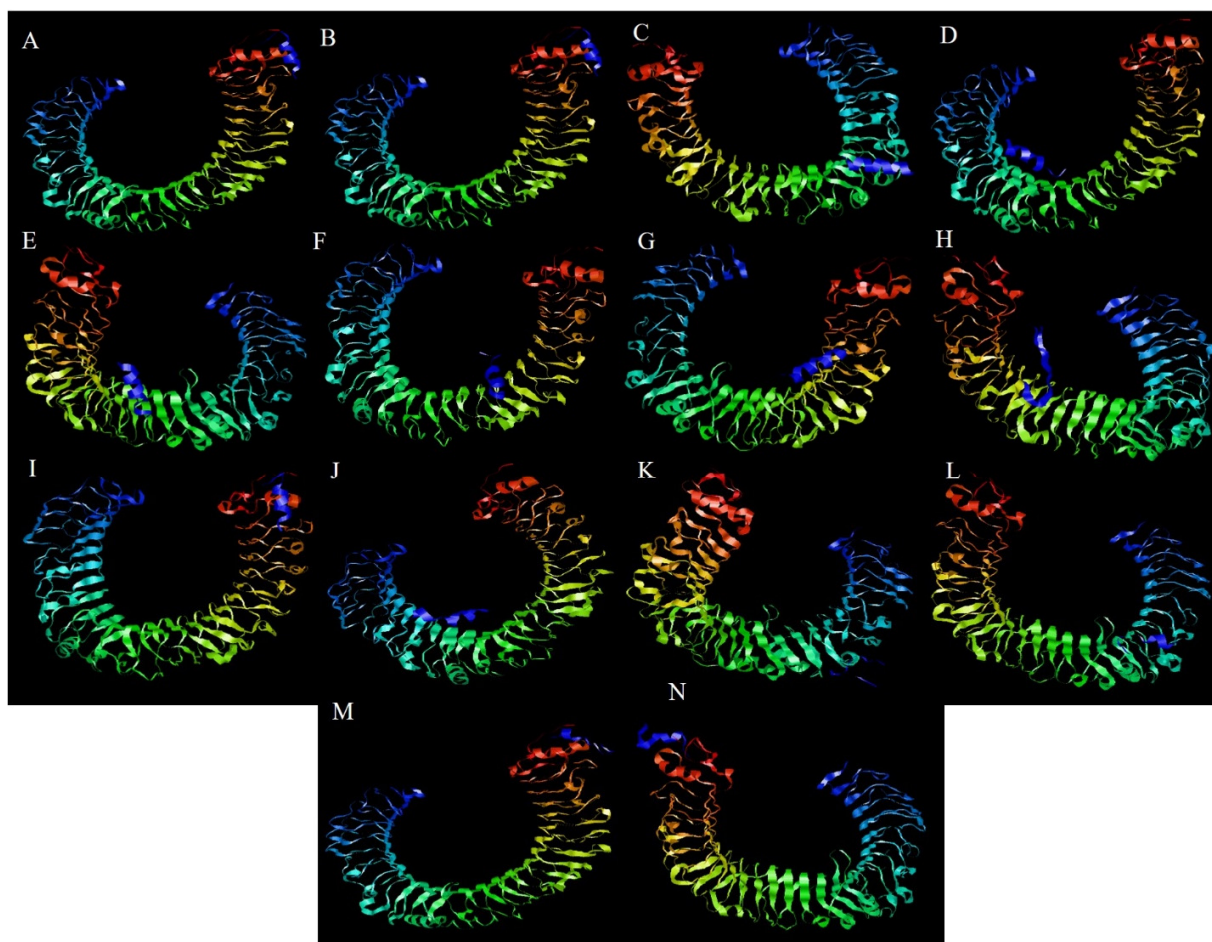

**Figure S2:** Molecular docking results of mimicking human peptides docked with TLR4 receptor.



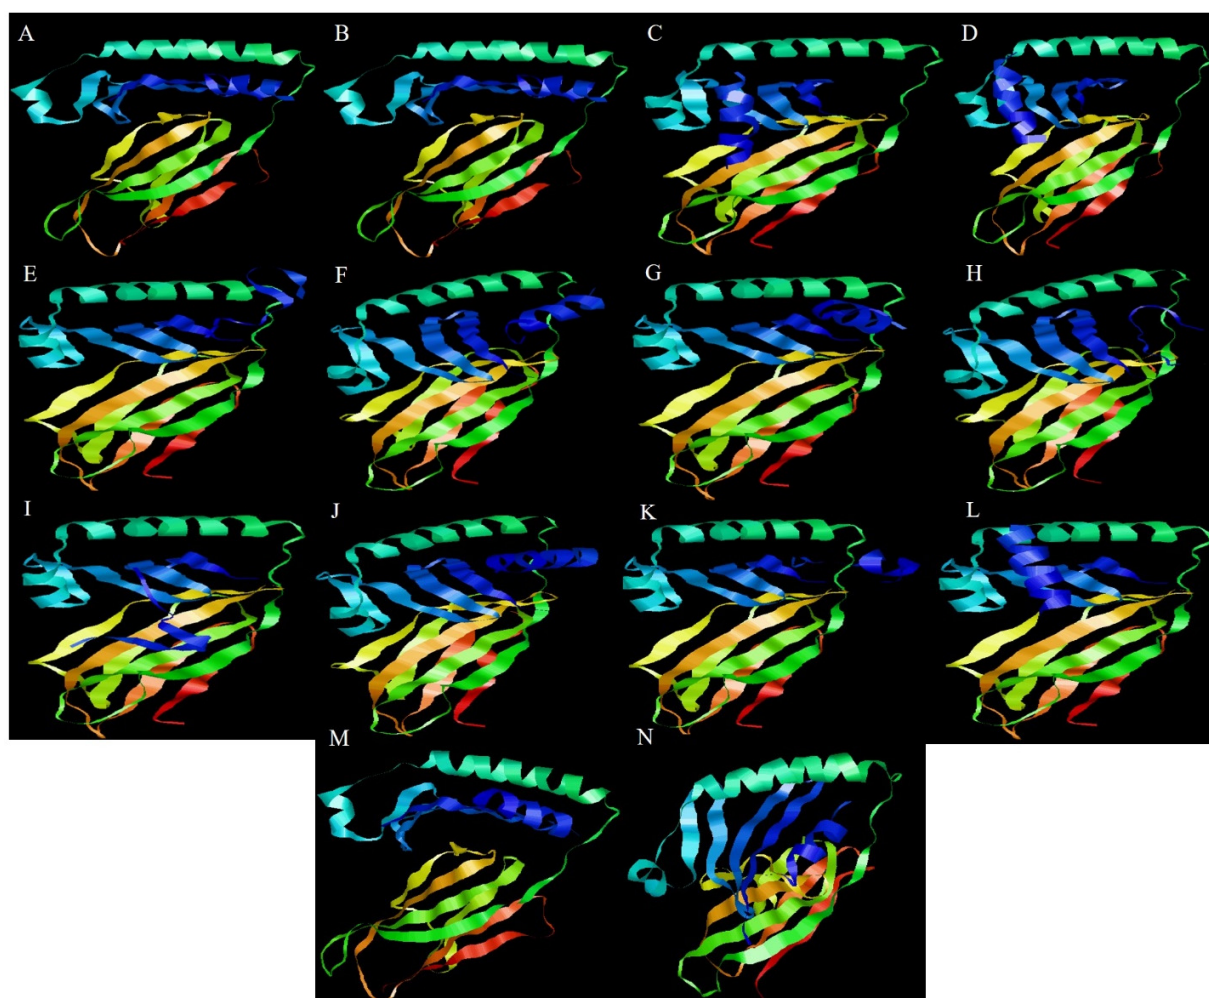

**Figure S3:** Molecular docking results of mimicking viral peptides docked with HLA receptor.



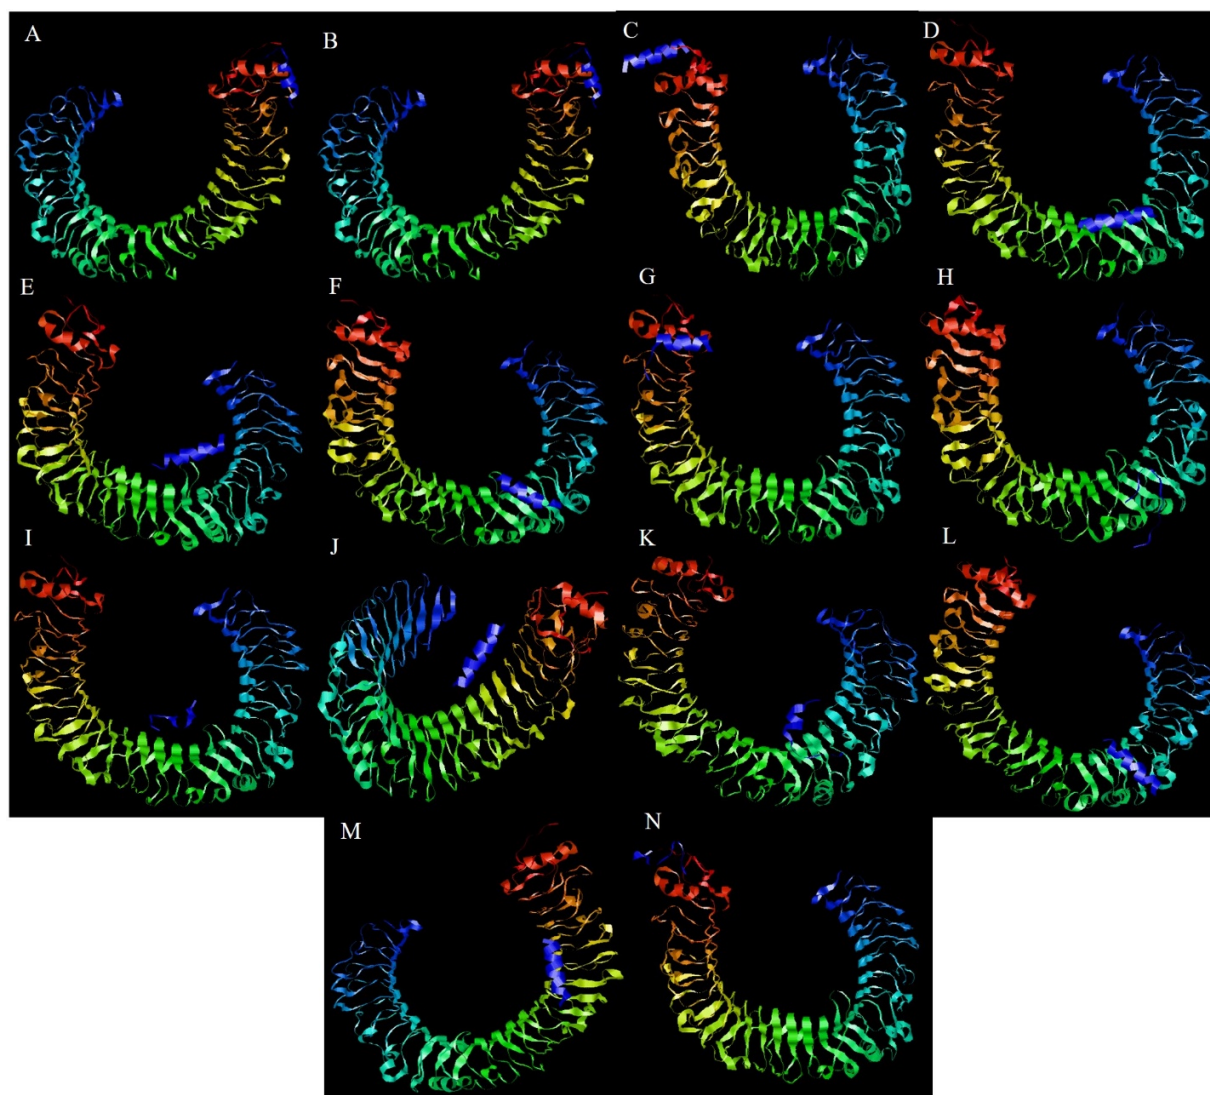

**Figure S4:** Molecular docking results of mimicking viral peptides docked with TLR4 receptor.
